# Supplementary material for: Free-standing supercapacitors from Kraft lignin nanofibers with remarkable volumetric energy density
Source: Royal Society of Chemistry journal article supplement (doi:10.1039/c8sc04936j), 2019-01-01
Supplement: c8sc04936j1.pdf [file c8sc04936j1.pdf]

## Free-standing Supercapacitors from Kraft Lignin Nanofibers with Remarkable Volumetric Energy Density

Philipp Schlee<sup>ab</sup>, Servann Herou<sup>abh</sup>, Rhodri Jervis<sup>c</sup>, Paul R. Shearing<sup>c</sup>, Dan J. L. Brett<sup>c</sup>, Darren Baker<sup>d</sup>, Omid Hosseinaei<sup>d</sup>, Per Tomani<sup>d</sup>, M. Mangir Murshed<sup>ei</sup>, Yaomin Li<sup>f</sup>, Maria José Mostazo-López<sup>g</sup>, Diego Cazorla-Amorós<sup>g</sup>, Ana Belen Jorge Sobrido<sup>ab</sup>, Maria-Magdalena Titirici<sup>†abh</sup>.

### Supplementary information

Molecular weight determination was performed by size exclusion chromatography (SEC). The SEC system consisted of a pre-column followed by two analytical columns, PSS MCX 10<sup>2</sup> and 10<sup>4</sup> nm, connected in series. The mobile phase was of a pH 12 buffer solution (NaOH and NaH<sub>2</sub>PO<sub>4</sub>\*H<sub>2</sub>O). The flow rate was 0.5 ml min<sup>-1</sup>. The samples were dissolved in NaOH, pH 13.5 and diluted to suitable concentrations with the mobile phase. Prior to injection, the samples were filtered (cellulose acetate syringe filter, 0.20 μm). The injection volume was 100 μl. Detection was performed using a UV detector (Knauer K-2501). The UV absorbance was measured at 280 nm. The SEC system was calibrated using sulfonated polystyrene standards with molecular weights ranging from 891 to 780 000 g mol<sup>-1</sup>.

Molecular weight of 1900 g mol<sup>-1</sup> and PDI of 1.5.

**Tab. S1** Elemental analysis of hardwood Kraft lignin precursor.

| Element | Content /wt% | Standard dev /wt% |
|---------|--------------|-------------------|
| C       | 62.21        | 0.07              |
| H       | 5.56         | 0.01              |
| N       | 0.17         | 0.01              |
| S       | 2.06         | 0.01              |
| O       | 30.0         | n.a.              |

The ash content was determined to be 0.3 wt%.

**Tab. S2** Results of Inductively Coupled Plasma-Optical Emission Spectroscopy (ICP-OES) of hardwood Kraft lignin precursor.

| Element | (mg/kg DS) |
|---------|------------|
| Al      | 23         |
| Ba      | 1          |
| Ca      | 69         |
| Cu      | 5.5        |
| Fe      | 43         |
| K       | 114        |
| Mg      | 22         |
| Mn      | 2.5        |
| Na      | 556        |
| P       | <1,25      |
| S       | 23083      |
| Si      | 8.2        |
| Zn      | 1.8        |
| Total   | 23,929     |
| Total-S | 846        |

Information on the NaNO<sub>3</sub>/polymer weight ratios in the spinning solutions:

**Tab. S3** NaNO<sub>3</sub>/polymer weight ratios in the spinning solutions.

| Sample | NaNO <sub>3</sub> / mol % | NaNO <sub>3</sub> /polymer |
|--------|---------------------------|----------------------------|
| N0     | 0                         | 0.000                      |
| N10    | 10                        | 0.059                      |
| N30    | 30                        | 0.179                      |
| N50    | 50                        | 0.299                      |

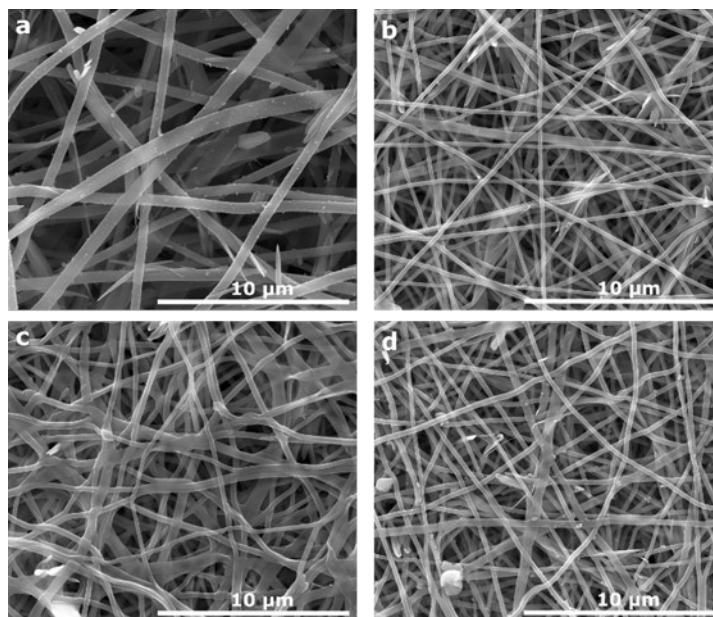

**Fig. S1** The as-spun Kraft lignin fiber mats with 0 (a), 10 (b), 30 (c), 50 (d) mol% of NaNO<sub>3</sub> in the electrospinning solution.

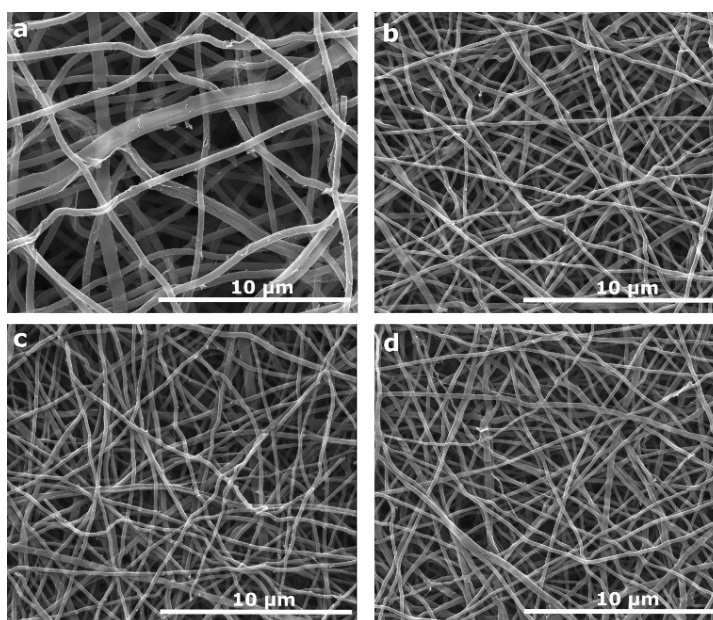

**Fig. S2** The CNF mats with 0 (a), 10 (b), 30 (c), 50 (d) mol% of NaNO<sub>3</sub> in the electrospinning solution.

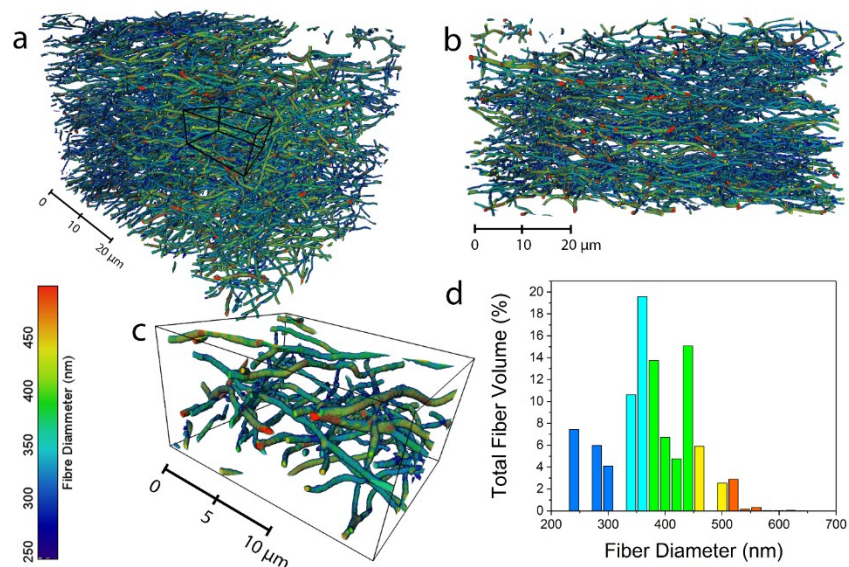

**Fig. S3** Fiber diameters of the carbonized NO fibers, calculated using the local thickness method on the fiber phase shown by applying a colourmap of fiber diameters to the 3D rendering of the fibers (a-c). The yz view in (b) shows no systematic change in the fiber diameter with thickness of the mat (z, time) and a close-up view of the variation of the fiber diameters is shown in (c), taken from a central subvolume of the whole sample (a). The histogram (d) shows the majority of the fibers having a diameter between 300 – 400 nm.

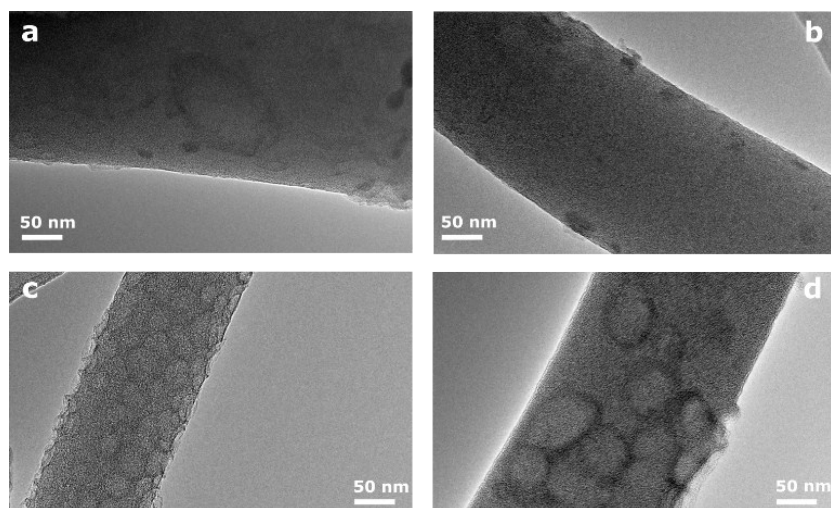

**Fig. S4** TEM micrographs of the CNFs with 0 (a), 10 (b), 30 (c), 50 (d) mol% of NaNO<sub>3</sub> in the electrospinning solution.

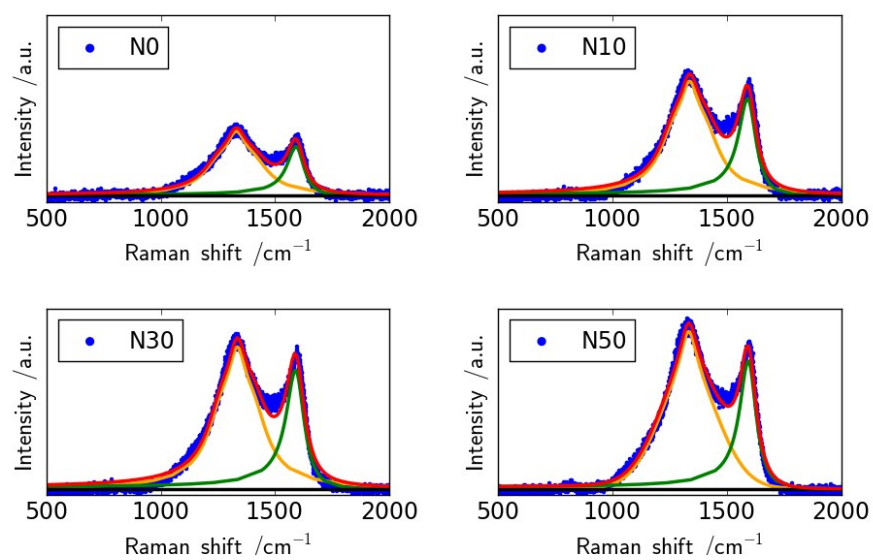

**Fig. S5** Normalized Raman spectra of the samples N0, N10, N30, N50 after baseline correction. Each spectrum was fitted using Breit-Wigner-Fano (BWF) and Pseudo-Voigt components.

The peak positions and the intensities (peak heights) were determined by fitting all spectra with a Breit-Wigner-Fano (BWF) and Pseudo-Voigt function using the OriginPro 9.1 suite.

**Tab. S4** Fitting parameters of the D- and G-band positions ( $\text{cm}^{-1}$ ) and estimated crystallite size  $L_a$  (nm) derived from the Raman spectra.

| Sample | D-band    | G-band    | $I(D)/I(G)$ | $L_a$ |
|--------|-----------|-----------|-------------|-------|
| N0     | 1330.8(5) | 1595.8(5) | 1.313       | 6.3   |
| N10    | 1337.2(4) | 1595.6(4) | 1.179       | 7.0   |
| N30    | 1334.9(4) | 1594.2(4) | 1.195       | 6.9   |
| N50    | 1333.4(3) | 1597.9(3) | 1.229       | 6.8   |

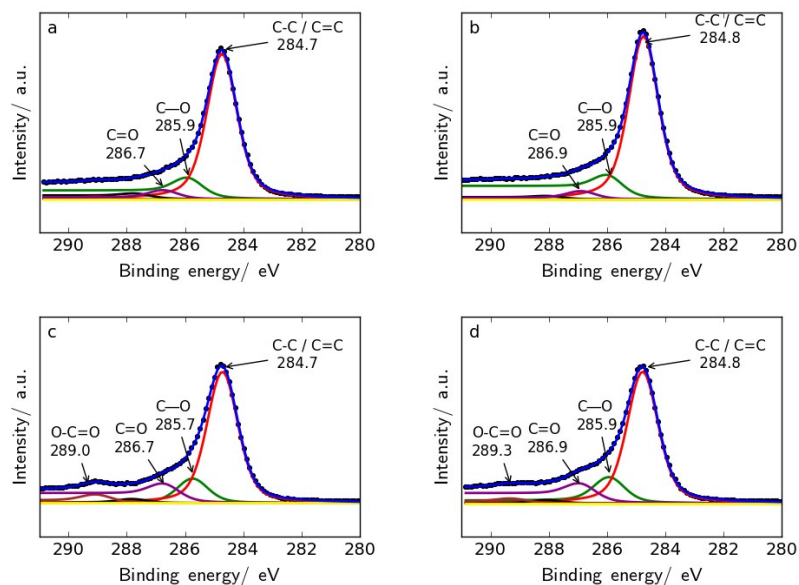

**Fig. S6** XPS high-resolution C 1s spectra of (a) N0, (b) N10, (c) N30, (d) N50.

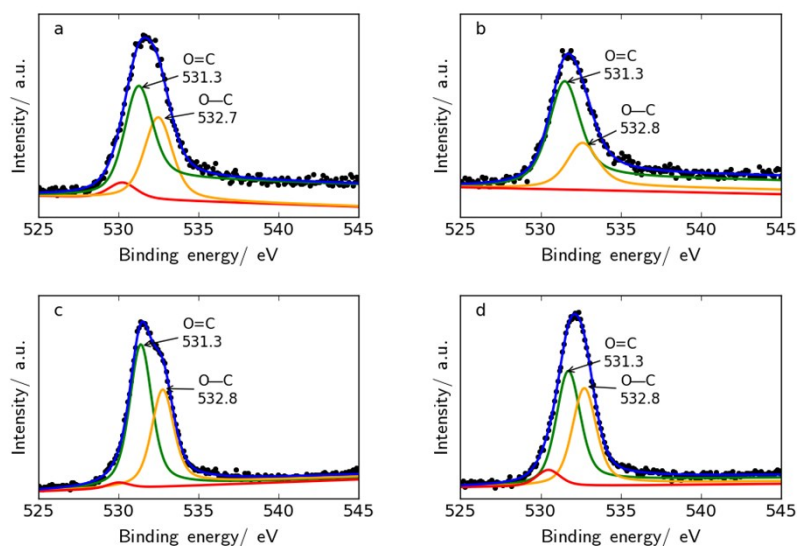

**Fig. S7** XPS high-resolution O 1s spectra of (a) N0, (b) N10, (c) N30, (d) N50.

**Tab. S5** Amount of CO<sub>2</sub> and CO ( $\mu\text{mol g}^{-1}$ ) and the resulting oxygen content (wt%) determined by TPD measurements.

| Sample | Amount | Amount | Amount | Oxygen |
|--------|--------|--------|--------|--------|
|--------|--------|--------|--------|--------|

|     | of CO <sub>2</sub> | of CO | of O | content |
|-----|--------------------|-------|------|---------|
| N0  | 1095               | 352   | 1798 | 2.9     |
| N10 | 889                | 547   | 1984 | 3.2     |
| N30 | 1201               | 447   | 2094 | 3.3     |
| N50 | 1849               | 498   | 2844 | 4.5     |

**Tab. S6** Overview over data derived from the N<sub>2</sub> and CO<sub>2</sub> gas adsorption experiments.

| Sample | N <sub>2</sub> adsorption                     |                                               |                                                           |                                                          |                                    | CO <sub>2</sub> adsorption                    |                                                           |                                                            |                                   |
|--------|-----------------------------------------------|-----------------------------------------------|-----------------------------------------------------------|----------------------------------------------------------|------------------------------------|-----------------------------------------------|-----------------------------------------------------------|------------------------------------------------------------|-----------------------------------|
|        | BET<br>SSA/<br>m <sup>2</sup> g <sup>-1</sup> | DFT<br>SSA/<br>m <sup>2</sup> g <sup>-1</sup> | Total<br>pore<br>vol./<br>cm <sup>3</sup> g <sup>-1</sup> | Pore<br>vol.<br><2nm/<br>cm <sup>3</sup> g <sup>-1</sup> | Pore<br>vol.<br>fraction<br><2nm/% | DFT<br>SSA/<br>m <sup>2</sup> g <sup>-1</sup> | Total<br>pore<br>vol./<br>cm <sup>3</sup> g <sup>-1</sup> | Pore<br>vol.<br><0.8nm/<br>cm <sup>3</sup> g <sup>-1</sup> | Pore vol.<br>fraction<br><0.8nm/% |
| N0     | 905                                           | 951                                           | 0.38                                                      | 0.32                                                     | 82.2                               | 1250                                          | 0.40                                                      | 0.24                                                       | 59.9                              |
| N10    | 972                                           | 994                                           | 0.46                                                      | 0.33                                                     | 72.2                               | 1194                                          | 0.39                                                      | 0.23                                                       | 60.1                              |
| N30    | 1054                                          | 1073                                          | 0.48                                                      | 0.36                                                     | 76.8                               | 1141                                          | 0.34                                                      | 0.26                                                       | 77.3                              |
| N50    | 1249                                          | 1236                                          | 0.52                                                      | 0.44                                                     | 84.5                               | 1437                                          | 0.48                                                      | 0.27                                                       | 55.8                              |

Within the experimental error, a linear correlation with a correlation coefficient of 0.97 between NaNO<sub>3</sub> content and DFT surface area derived from the N<sub>2</sub> adsorption could be found. The linear fitting equation is:  $s = 5.5695 \cdot c + 938.19$ . Where  $s$  = DFT surface area [m<sup>2</sup> g<sup>-1</sup>] and  $c$  = concentration of NaNO<sub>3</sub> in the electrospinning solution [mol%].

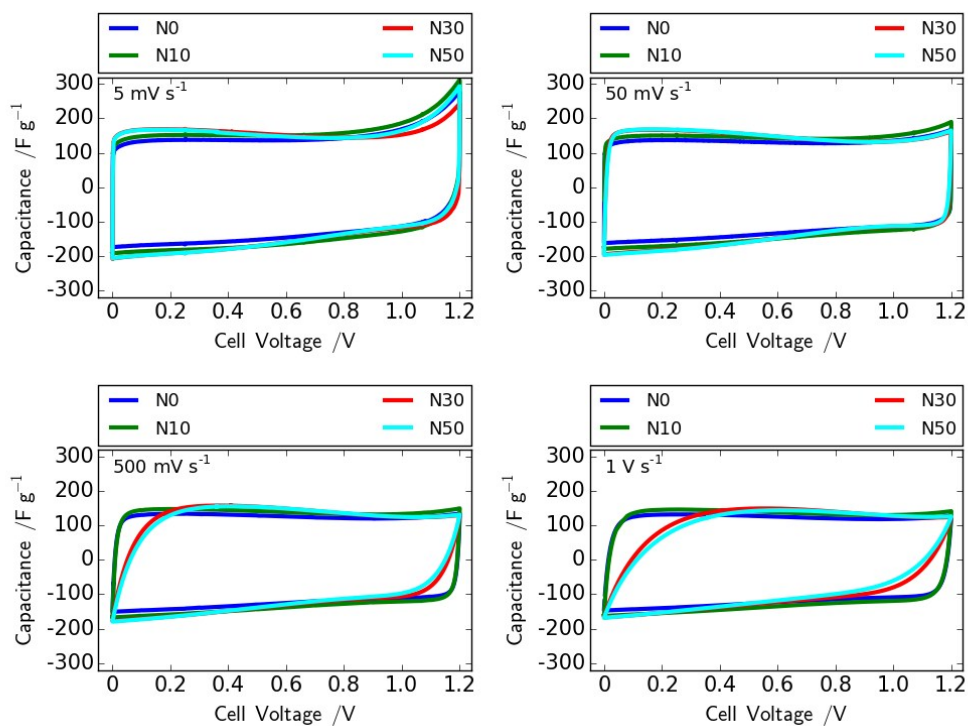

**Fig. S8** Voltammograms of N0 (blue), N10 (green), N30 (red), N50 (cyan) measured in 6 M KOH at various scan rates.

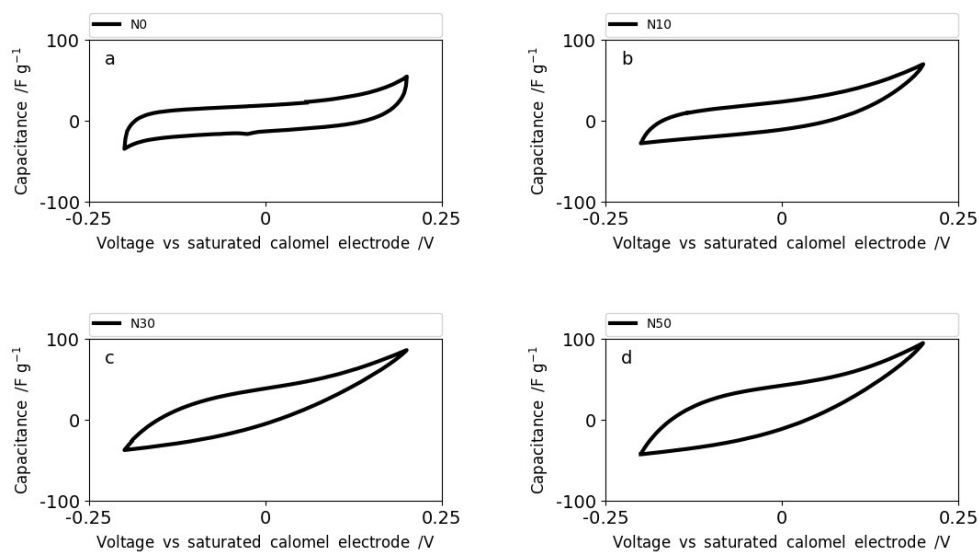

**Fig. S9** Voltammograms measured in a three-electrode set-up in 6M KOH.

From the three electrode measurements it is apparent that the capacitive part shifts gradually towards more negative potentials upon addition of  $\text{NaNO}_3$  compared to N0.



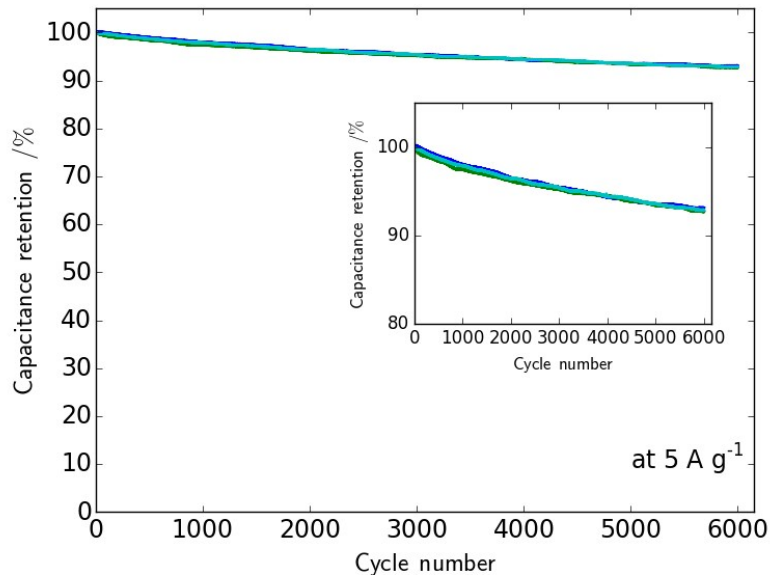

**Fig. S10** Capacitance retention for all four samples at 5 A g<sup>-1</sup> for 6000 cycles.

Capacitance and energy density calculation:

$$C [F g^{-1}] = \frac{4 * Q * 3.6}{(dV - IR) * m_{cell}}$$

$$C [F cm^2] = \frac{4 * Q * 3.6}{(dV - IR) * A_{WE}}$$

**Where:**

Q = discharge capacity [mAh] determined by EC Lab software (multiplied by 3.6 for [A\*s])

dV= potential difference

IR= IR drop measured from the discharge curves.

m<sub>cell</sub> = total weight of carbon in the supercapacitor

A<sub>WE</sub> = are of working electrode (0.785 cm<sup>2</sup>)

$$E [Wh kg^{-1}] = \frac{0.5 * Q * V}{m_{cell}}$$

**Where:**

Q = discharge capacity

V= potential window

m<sub>cell</sub> = total weight of carbon in the supercapacitor

**Tab. S7** Parameters for the electrospinning process. Some parameters change or are adjusted during the electrospinning process. For this reason, the initial and final value of each parameter is reported here.

| Parameter   | N0      |       | N10, N30, N50 |       | unit               |
|-------------|---------|-------|---------------|-------|--------------------|
|             | initial | final | initial       | final |                    |
| Humidity    | 10      | 10    | 10            | 10    | %                  |
| Temperature | 22      | 22    | 22            | 22    | °C                 |
| Rate        | 1       | 1     | 1.1           | 1.0   | ml h <sup>-1</sup> |
| Voltage     | 19      | 20    | 25            | 24    | kV                 |
| Distance    | 20      | 20    | 18            | 18    | cm                 |
